# Supplementary material for: Potential of LC Coupled to Fluorescence Detection in Food Metabolomics: Determination of Phenolic Compounds in Virgin Olive Oil
Source: PubMed Central journal article supplement (PMC5085660; doi:10.3390/ijms17101627), 2016-09-24
Supplement: ijms-17-01627-s001.pdf [file ijms-17-01627-s001.pdf]

# Supplementary Materials: Potential of LC Coupled to Fluorescence Detection in Food Metabolomics: Determination of Phenolic Compounds in Virgin Olive Oil

Romina P. Monasterio, Lucía Olmo-García, Aadil Bajoub, Alberto Fernández-Gutiérrez and Alegría Carrasco-Pancorbo

**Table S1.** Molecular formula, chemical structure, retention time and fluorescence maxima of the phenolic compounds under study.

| Compounds                          | $t_R$ (min) | Molecular Formula                             | Structure                                                                             | $\lambda_{exc}$ (nm) | $\lambda_{em}$ (nm) | Selected $\lambda_{em}$ (nm) | Group                    |
|------------------------------------|-------------|-----------------------------------------------|---------------------------------------------------------------------------------------|----------------------|---------------------|------------------------------|--------------------------|
| Oxidized hydroxytyrosol (OxHTY)    | 3.3         | C <sub>8</sub> H <sub>8</sub> O <sub>3</sub>  | 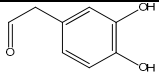   | 235, 285             | 324                 | 328                          | Simple phenolic alcohols |
| Gallic acid (Gal)                  | 4.8         | C <sub>7</sub> H <sub>6</sub> O <sub>5</sub>  |    | 278 <sup>a</sup>     | 376                 | 350                          | Benzoic derivate         |
| Hydroxytyrosol (HTY)               | 6.9         | C <sub>8</sub> H <sub>10</sub> O <sub>3</sub> |    | 235, 285             | 324                 | 328                          | Simple phenolic alcohols |
| Tyrosol (TY)                       | 8.6         | C <sub>8</sub> H <sub>10</sub> O <sub>2</sub> |    | 232, 283             | 313                 | 316                          | Simple phenolic alcohols |
| 4-Hydroxybenzoic acid (4-HBA)      | 9.0         | C <sub>7</sub> H <sub>6</sub> O <sub>3</sub>  |   | 265                  | 328, 340            | 350                          | Benzoic derivate         |
| 4-Hydroxyphenylacetic acid (4-HPA) | 9.4         | C <sub>8</sub> H <sub>8</sub> O <sub>3</sub>  |  | 234, 280             | 316                 | 316                          | Other phenolic compounds |
| Vanillic acid (Van)                | 9.7         | C <sub>8</sub> H <sub>8</sub> O <sub>4</sub>  |  | 269, 294             | 356                 | 350                          | Benzoic derivate         |

Table S1. Cont.

| Compounds                                   | t <sub>R</sub> (min) | Molecular Formula                              | Structure                                                                             | λ <sub>exc</sub> (nm)               | λ <sub>em</sub> (nm) | Selected λ <sub>em</sub> (nm) | Group                    |
|---------------------------------------------|----------------------|------------------------------------------------|---------------------------------------------------------------------------------------|-------------------------------------|----------------------|-------------------------------|--------------------------|
| Syringic acid<br>(Syr)                      | 9.8                  | C <sub>9</sub> H <sub>10</sub> O <sub>5</sub>  | 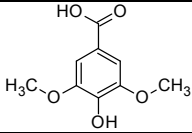   | 233, 285                            | 362                  | 350                           | Benzoic derivate         |
| Homovanillic acid<br>(Hmvan)                | 10.0                 | C <sub>9</sub> H <sub>10</sub> O <sub>4</sub>  |    | 239, 283, 298 <sup>a</sup>          | 320                  | 316                           | Benzoic derivate         |
| <i>p</i> -coumaric acid<br>( <i>p</i> -Cou) | 11.6                 | C <sub>9</sub> H <sub>8</sub> O <sub>3</sub>   |    | 239 <sup>b</sup> , 300 <sup>b</sup> | 414                  | 450                           | Hydroxycinnamic derivate |
| Vanillin<br>(Val)                           | 11.8                 | C <sub>8</sub> H <sub>8</sub> O <sub>3</sub>   |    | 241 <sup>b</sup> , 296 <sup>b</sup> | 415                  | 450                           | Other phenolic compounds |
| Sinapic acid<br>(Sin)                       | 12.1                 | C <sub>11</sub> H <sub>12</sub> O <sub>5</sub> |    | 249 <sup>b</sup> , 310 <sup>b</sup> | 448                  | 450                           | Hydroxycinnamic derivate |
| Ferulic acid<br>(Fer)                       | 12.3                 | C <sub>10</sub> H <sub>10</sub> O <sub>4</sub> |   | 250 <sup>b</sup> , 303 <sup>b</sup> | 440                  | 450                           | Hydroxycinnamic derivate |
| <i>m</i> -coumaric acid<br>( <i>m</i> -Cou) | 12.8                 | C <sub>9</sub> H <sub>8</sub> O <sub>3</sub>   |  | 285 <sup>b</sup>                    | 434                  | 450                           | Hydroxycinnamic derivate |

Table S1. Cont.

| Compounds                                 | tr (min)                                         | Molecular Formula                               | Structure                                                                             | $\lambda_{exc}$ (nm)                | $\lambda_{em}$ (nm) | Selected $\lambda_{em}$ (nm) | Group                    |
|-------------------------------------------|--------------------------------------------------|-------------------------------------------------|---------------------------------------------------------------------------------------|-------------------------------------|---------------------|------------------------------|--------------------------|
| Hydroxytyrosol acetate (AcHTY)            | 13.2                                             | C <sub>9</sub> H <sub>10</sub> O <sub>4</sub>   | 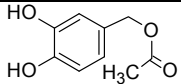   | 235, 285                            | 323                 | 328                          | Simple phenolic alcohols |
| Oleuropein (Ole)                          | 13.6                                             | C <sub>25</sub> H <sub>32</sub> O <sub>13</sub> |    | 236, 285, 328 <sup>b</sup>          | 324                 | 328                          | Secoiridoids             |
| <i>o</i> -coumaric acid ( <i>o</i> -Cou)  | 14.0                                             | C <sub>9</sub> H <sub>8</sub> O <sub>3</sub>    |    | 284 <sup>b</sup> , 322 <sup>b</sup> | 454, 522            | 450                          | Hydroxycinnamic derivate |
| Oleuropein aglycone (OleAgly)             | 15.2, 18.5, 19.5, 19.8, 21.5 (main isomer), 22.2 | C <sub>19</sub> H <sub>22</sub> O <sub>8</sub>  |    | 235, 285                            | 321                 | 316                          | Secoiridoids             |
| Luteolin (Lut)                            | 16.5                                             | C <sub>15</sub> H <sub>10</sub> O <sub>6</sub>  |    | 255                                 | 330, 434            | 450                          | Flavonoids               |
| Decarboxymethyl oleuropein aglycone (DOA) | 16.7                                             | C <sub>18</sub> H <sub>20</sub> O <sub>4</sub>  |  | 240, 284                            | 316                 | 316                          | Secoiridoids             |

Table S1. Cont.

| Compounds                        | t <sub>R</sub> (min)              | Molecular Formula                              | Structure | λ <sub>exc</sub> (nm) | λ <sub>em</sub> (nm) | Selected λ <sub>em</sub> (nm) | Group        |
|----------------------------------|-----------------------------------|------------------------------------------------|-----------|-----------------------|----------------------|-------------------------------|--------------|
| Pinoresinol<br>(Pin)             | 17.3                              | C <sub>20</sub> H <sub>22</sub> O <sub>6</sub> |           | 238, <b>285</b>       | 323                  | 328                           | Lignans      |
| Acetoxypinoresinol<br>(AcPin)    | 17.9                              | C <sub>22</sub> H <sub>24</sub> O <sub>8</sub> |           | 240, <b>284</b>       | 322                  | 328                           | Lignans      |
| Ligtroside Aglycone<br>(LigAgly) | 22.4, 23.8<br>(main isomer), 24.0 | C <sub>19</sub> H <sub>22</sub> O <sub>7</sub> |           | 232, <b>281</b>       | 314                  | 316                           | Secoiridoids |

Maximum excitation wavelengths obtained when λ<sub>em</sub> is set at 325 nm except for <sup>a</sup> (360 nm) and <sup>b</sup> (450 nm). Maximum emission wavelengths obtained when λ<sub>exc</sub> is set at 285 nm. In both columns of λ<sub>exc</sub> and λ<sub>em</sub> (nm), we highlight in bold letter the most convenient wavelength value when more than one fluorescence maximum were found.

**Table S2.** Comparison between the methodology described herein and the previously published methods with FL detection for the determination of phenolic compounds in olive oil and related matrixes.

| Analytical Technique | Extraction Procedure of the Phenolic Compounds                                                                                 | Matrix     | Number of Needed Injections in FLD | Number of Analytes Using FLD/ Total Analytes | Purpose                                                  | FLD Wavelengths (nm) for Each Analyte                                                                                                                                                                     | Ref.             |
|----------------------|--------------------------------------------------------------------------------------------------------------------------------|------------|------------------------------------|----------------------------------------------|----------------------------------------------------------|-----------------------------------------------------------------------------------------------------------------------------------------------------------------------------------------------------------|------------------|
| LC-DAD-FLD/LC-MS     | SPE (1 g olive powder → 5 mL methanol/water (50:50 v/v), dilution 1:10)                                                        | Olives     | 2                                  | 6/26                                         | Identification                                           | $\lambda_{exc} = 280$ , $\lambda_{em} = 320$ (TY, Van, Ole);<br>$\lambda_{em} = 320$ (chlorogenic acid, caffeic acid (Caf), <i>p</i> -Cou)                                                                | [17]             |
| LC-DAD-FLD           | LLE (0.6 mL olive oil → 1.8 mL DMF)                                                                                            | Olive oil  | 1                                  | 9/14                                         | Quantification of lignans and identification of the rest | $\lambda_{exc} = 280$ , $\lambda_{em} = 320$ (HTY, TY, AcHTY, AcPin, Pin, OleAgly, LigAgly, DOA, decarboxymethyl ligstroside aglycon (DLA))                                                               | [15]             |
| LC-DAD-FLD           | LLE (0.6 mL olive oil → 1.8 mL DMF)                                                                                            | Olive oil  | 1                                  | 9/14                                         | Identification                                           | $\lambda_{exc} = 280$ , $\lambda_{em} = 320$ (HTY, TY, AcHTY, AcPin, Pin, OleAgly, LigAgly, DOA, DLA)                                                                                                     | [16]             |
| LC-FLD               | LLE (50 $\mu$ L rat plasma → 100 $\mu$ L water)                                                                                | Rat plasma | 1                                  | 2                                            | Quantification                                           | $\lambda_{exc} = 281$ , $\lambda_{em} = 316$ (HTY, Ole)                                                                                                                                                   | [21]             |
| LC-DAD-FLD           | LLE (90g olive oil → 10 mL); Direct injection (2 g olive oil + 10 mL acetone)                                                  | Olive oil  | 1                                  | 7/7                                          | Quantification                                           | $\lambda_{exc} = 280$ , $\lambda_{em} = 353$ (HTY, TY, OleAgly, DOA);<br>$\lambda_{em} = 313$ (DLA); $\lambda_{em} = 339$ (Pin, AcPin)                                                                    | [22]             |
| CE-DAD-FLD           | LLE (5 g olive oil → 1 mL ethanol); Direct injection for HTY, Van, Caf (6 mL olive oil + 6 mL 1-propanol)                      | Olive oil  | 1                                  | 5/9                                          | Quantification                                           | $\lambda_{exc} = 297$ , $\lambda_{em} = 320$ (gentisic acid (Gen), Caf, Van, HTY, <i>o</i> -Cou)                                                                                                          | [20]             |
| CE-DAD-FLD           | Direct injection for HTY and Van (6 mL olive oil + 6 mL 1-propanol); SPE (60 g olive oil → 2 mL methanol)                      | Olive oil  | 1                                  | 6/9                                          | Quantification                                           | $\lambda_{exc} = 297$ , $\lambda_{em} = 320$ (quercetin, Gen, Caf, Van, HTY, <i>o</i> -Cou)                                                                                                               | [18]             |
| LC-DAD-FLD           | LLE for HTY and TY (1g → 2 mL ethanol, dilution 1:10); SPE for the rest (15 g → 1 mL methanol/water (50:50 v/v), dilution 1:2) | Olive oil  | 2                                  | 12/16                                        | Quantification                                           | $\lambda_{exc} = 300$ , $\lambda_{em} = 330$ (4-HPA, 4-HBA);<br>$\lambda_{em} = 350$ (Van, HTY and TY); $\lambda_{em} = 380$ (Syr);<br>$\lambda_{em} = 450$ (Gal, Gen, Fer, <i>p</i> -Cou, <i>o</i> -Cou) | [19]             |
| LC-DAD-FLD           | LLE (3 g olive oil → 4 mL methanol/water (60:40 v/v))                                                                          | Olive oil  | 1                                  | 4/8                                          | Quantification                                           | $\lambda_{exc} = 250$ , $\lambda_{em} = 350$ (HTY, TY, Van, OleAgly)                                                                                                                                      | [23]             |
| LC-DAD-FLD           | LLE (3 g olive oil → 4 mL methanol/water (60:40 v/v))                                                                          | Olive oil  | 1                                  | 7/11                                         | Quantification                                           | $\lambda_{exc} = 250$ , $\lambda_{em} = 350$ (HTY, TY, Van, OleAgly, LigAgly, DOA, DLA)                                                                                                                   | [24]             |
| LC-FLD               | LLE (2 g olive oil → 1 mL methanol)                                                                                            | Olive oil  | 1                                  | 26 (plus 7 isomers)                          | Quantification of 23 of them (plus 7 isomers)            | See Table S1                                                                                                                                                                                              | This methodology |
